# Supplementary material for: Assessing the risk of rapid fibroid growth in patients with asymptomatic solitary uterine myoma using a multivariate prediction model
Source: PubMed Central journal article supplement — Ann Transl Med. 2021 Mar;9(5):370. doi: 10.21037/atm-20-4559 (PMC8033343; doi:10.21037/atm-20-4559), 2021-03
Supplement: atm-09-05-370-dss.pdf [file atm-09-05-370-dss.pdf]

## Data Sharing Statement

|                     |                                                                                                                                                    |                                                                                                                                                                |
|---------------------|----------------------------------------------------------------------------------------------------------------------------------------------------|----------------------------------------------------------------------------------------------------------------------------------------------------------------|
| <b>Article Info</b> | <a href="http://dx.doi.org/10.21037/atm-20-4559">http://dx.doi.org/10.21037/atm-20-4559</a>                                                        |                                                                                                                                                                |
| <b>Item</b>         | <b>Question</b>                                                                                                                                    | <b>Authors' Response<br/>(place "-" if not applicable)</b>                                                                                                     |
| 1                   | Would you like to share data collected for your study to others?                                                                                   | Yes                                                                                                                                                            |
| 2                   | If not, would you like to share the reason for your decision?                                                                                      | -                                                                                                                                                              |
| 3                   | What data in particular will be shared?                                                                                                            | The Hematology tests of the 739 patients diagnosed with uterine fibroids by the inclusion and exclusion criteria. (Does not contain any personal information.) |
| 4                   | Any other documents will be share? Such as study protocol, statistical analysis plan, informed consent form, clinical study report, analytic code. | -                                                                                                                                                              |
| 5                   | When will data availability begin?                                                                                                                 | After publication                                                                                                                                              |
| 6                   | When will data availability end?                                                                                                                   | -                                                                                                                                                              |
| 7                   | To whom will you share the data?                                                                                                                   | -                                                                                                                                                              |
| 8                   | For what type of analysis or purpose?                                                                                                              | Only for research                                                                                                                                              |
| 9                   | How or where can the data/documents be obtained?                                                                                                   | Email: 287684109@qq.com                                                                                                                                        |
| 10                  | Any other restrictions?                                                                                                                            | -                                                                                                                                                              |
