# Supplementary material for: Assessing the risk of rapid fibroid growth in patients with asymptomatic solitary uterine myoma using a multivariate prediction model
Source: PubMed Central journal article supplement — Ann Transl Med. 2021 Mar;9(5):370. doi: 10.21037/atm-20-4559 (PMC8033343; doi:10.21037/atm-20-4559), 2021-03
Supplement: atm-09-05-370-supplementary.pdf [file atm-09-05-370-supplementary.pdf]

Supplementary

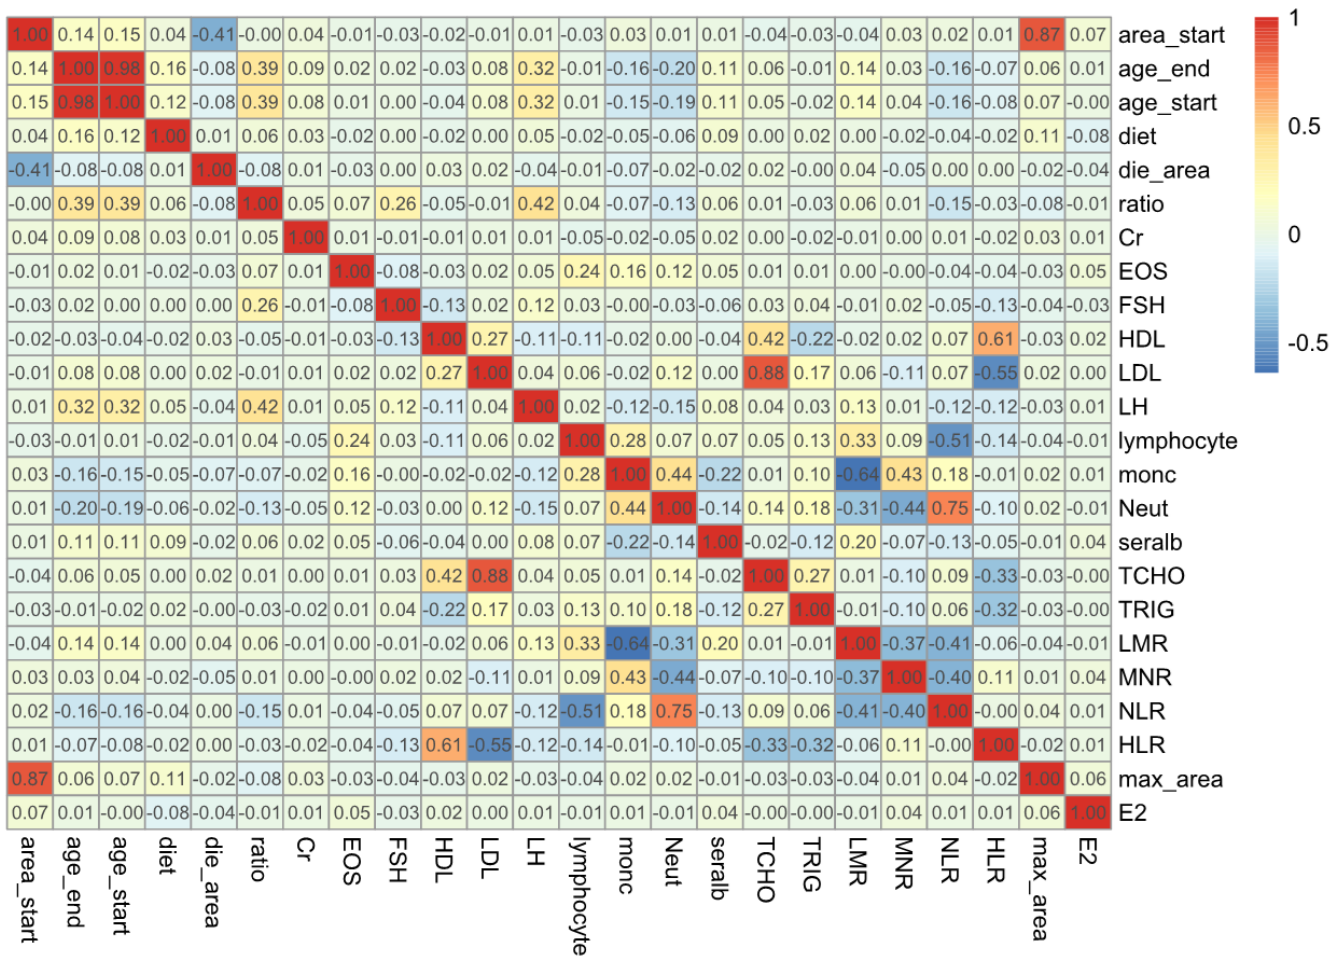

**Figure S1** The correlation between the various clinically tested factors. The color and value represent the correlation coefficient. Cr, creatinine; EOS, eosinophil; FSH, follicle-stimulating hormone; HDL, high-density lipoprotein; LDL, low-density lipoprotein; LH, luteinizing hormone; Monc, monocytes; Neut, neutrophils; TCHO, total cholesterol; TRIG, triglyceride; LMR, lymphocyte to monocyte ratio; MNR, monocytes to neutrophil ratio; NLR, neutrophil to lymphocyte ratio; HLR, high-density lipoprotein to low-density lipoprotein ratio; E2, estradiol.
